# Supplementary material
Source: Springer Nature journal article supplement (https://www.springermedizin.de/resource/supplementary/12889_2012_4864_MOESM1_ESM.pdf/9490612)
Supplement: MOESM1 [file 9490612]

## Tables

**Table 1: Relationship between risk factors of water supply status among PLWHA on Home Based Care clients of Gondar town, 2009. (n= 294)**

| Characteristics                                 |                                  | General Water supply |          |                      |                         |
|-------------------------------------------------|----------------------------------|----------------------|----------|----------------------|-------------------------|
|                                                 |                                  | status               |          | Crude OR<br>(95% CI) | Adjusted OR<br>(95% CI) |
|                                                 |                                  | Unimproved           | Improved |                      |                         |
| Educational status                              | Illiterate(can't Read and write) | 58                   | 71       | 1.0                  | 1.0                     |
|                                                 | Read and write                   | 27                   | 14       | 2.36(1.13,4.91)*     | 4.20(0.92, 19.02)       |
|                                                 | Elementary                       | 17                   | 34       | 0.61(0.31,1.20)      | 0.74(0.19, 2.78)        |
|                                                 | Secondary                        | 19                   | 39       | 0.59(0.31,1.14)      | 0.50(0.17, 1.46)        |
|                                                 | Above grade12                    | 5                    | 10       | 0.61(0.19,1.89)      | 0.16(0.01, 2.15)        |
| Income quintile                                 | Lowest( poorest)                 | 15                   | 38       | 0.47(0.20,1.081)     | 0.67(0.137, 3.36)       |
|                                                 | Second (poor)                    | 11                   | 30       | 0.43(0.17,1.706)     | 0.39(0.057, 2.77)       |
|                                                 | Third (middle)                   | 52                   | 48       | 1.29(0.64,2.59)      | 3.55(0.96, 13.13)       |
|                                                 | Fourth(High)                     | 27                   | 27       | 1.19(0.54,2.61)      | 2.99(0.72, 12.42)       |
|                                                 | Fifth (Highest)                  | 21                   | 25       | 1.0                  | 1.0                     |
| Discrimination of family member in water source | Yes                              | 9                    | 9        | 1.35 (0.52, 3.52)    | 0.43 (0.06, 2.84)       |
|                                                 | No                               | 117                  | 159      | 1.0                  | 1.0                     |
| Discrimination of PLWHA in water source         | Yes                              | 13                   | 22       | 0.76(.36, 1.58)      | 1.61 (0.44, 5.86)       |
|                                                 | No                               | 113                  | 146      | 1.0                  | 1.0                     |
| Forced to go far distance to fetch water        | Yes                              | 9                    | 4        | 3.91(1.13, 13.47)*   | 3.84 (0.41, 35.27)      |
|                                                 | No                               | 42                   | 73       | 1.0                  | 1.0                     |

|              |     |     |     |                   |                    |
|--------------|-----|-----|-----|-------------------|--------------------|
| do you need  | yes | 1   | 11  | 0.11(0.01, 0.89)* | 0.13(0.01, 1.44)   |
| help with    | No  | 125 | 157 | 1.0               | 1.0                |
| walking      |     |     |     |                   |                    |
| diarrhea for |     | 15  | 8   | 2.70(1.10, 6.59)* | 6.13(1.23, 30.57)* |
| the past 24  | Yes |     |     |                   |                    |
| hour         | No  | 111 | 160 | 1.0               | 1.0                |

---

\* Statistically significant association p<0.05
